# Supplementary material for: Bis(pyridyl) ancillary ligands modulated uninodal 4-, 5- and 6-connected Cd(ii) coordination polymers based on 3,4-thiophenedicarboxylate linker
Source: Royal Society of Chemistry journal article supplement (doi:10.1039/c3ce26686a), 2013-01-01
Supplement: c3ce26686a.pdf [file c3ce26686a.pdf]

## *Supporting Information*

# **Bis(pyridyl) ancillary ligands modulated uninodal 4-, 5- and 6-connected Cd(II) coordination polymers based on 3,4-thiophenedicarboxylate linker**

**Zhao-Hao Li, Li-Ping Xue, \* Shi-Hui Li, Jian-Ge Wang, Bang-Tun Zhao,\* Jian Kan and Wei-Ping Su \***

*<sup>a</sup> College of Chemistry and Chemical Engineering, Luoyang Normal University, Luoyang, Henan 471022, P. R. China,*

*E-mail: lpxue@163.com; zbt@lynu.edu.cn*

*<sup>b</sup> State Key Laboratory of Structural Chemistry, Fujian Institute of Research on the Structure of Matter, The Chinese*

*Academy of Sciences, Fuzhou, Fujian 350002, P. R. China, E-mail: wpsu@fjirsm.ac.cn*

**Tables S1** Selected Bond Distances (Å) and Angles (deg) for Complexes 1–3<sup>a</sup>

| Compound 1 <sup>a</sup>                                                                                                                     |            |                     |            |                     |            |
|---------------------------------------------------------------------------------------------------------------------------------------------|------------|---------------------|------------|---------------------|------------|
| Cd(1)–O(1)                                                                                                                                  | 2.2946(17) | Cd(1)–O(3)          | 2.4095(16) | Cd(1)–O(4)#1        | 2.3634(15) |
| Cd(1)–O(5)#1                                                                                                                                | 2.4474(18) | Cd(1)–N(1)          | 2.3627(19) | Cd(1)–N(2)          | 2.2980(18) |
| O(1)–Cd(1)–N(2)                                                                                                                             | 122.45(6)  | O(1)–Cd(1)–N(1)     | 105.48(7)  | N(2)–Cd(1)–N(1)     | 91.42(7)   |
| O(1)–Cd(1)–O(4)#1                                                                                                                           | 94.59(6)   | N(2)–Cd(1)–O(4)#1   | 139.61(6)  | N(1)–Cd(1)–O(4)#1   | 93.61(6)   |
| O(1)–Cd(1)–O(3)                                                                                                                             | 81.84(6)   | N(2)–Cd(1)–O(3)     | 81.99(6)   | N(1)–Cd(1)–O(3)     | 172.11(6)  |
| O(4)#1–Cd(1)–O(3)                                                                                                                           | 88.67(6)   | O(1)–Cd(1)–O(5)#1   | 147.19(6)  | N(2)–Cd(1)–O(5)#1   | 85.95(6)   |
| N(1)–Cd(1)–O(5)#1                                                                                                                           | 88.26(7)   | O(4)#1–Cd(1)–O(5)#1 | 54.24(5)   | O(3)–Cd(1)–O(5)#1   | 86.94(6)   |
| <sup>a</sup> Symmetry codes: #1 x,-y+1,z+1/2; #2 x,-y+1,z-1/2; #3 -x,-y+1,-z+1; #4 -x+1/2,-y+3/2,-z.                                        |            |                     |            |                     |            |
| Compound 2 <sup>b</sup>                                                                                                                     |            |                     |            |                     |            |
| Cd(1)–O(1)                                                                                                                                  | 2.416(5)   | Cd(1)–O(2)          | 2.438(5)   | Cd(1)–O(3)#1        | 2.321(5)   |
| Cd(1)–O(4)#1                                                                                                                                | 2.579(5)   | Cd(1)–N(1)          | 2.405(6)   | Cd(1)–N(3)          | 2.358(6)   |
| Cd(1)–N(2)#2                                                                                                                                | 2.351(6)   |                     |            |                     |            |
| O(3)#1–Cd(1)–N(2)#2                                                                                                                         | 92.7(2)    | O(3)#1–Cd(1)–N(3)   | 88.23(18)  | N(2)#2–Cd(1)–N(3)   | 173.3(2)   |
| O(3)#1–Cd(1)–N(1)                                                                                                                           | 134.80(19) | N(2)#2–Cd(1)–N(1)   | 89.6(2)    | N(3)–Cd(1)–N(1)     | 85.1(2)    |
| O(3)#1–Cd(1)–O(1)                                                                                                                           | 142.2(2)   | N(2)#2–Cd(1)–O(1)   | 96.0(2)    | N(3)–Cd(1)–O(1)     | 87.2(2)    |
| N(1)–Cd(1)–O(1)                                                                                                                             | 82.1(2)    | O(3)#1–Cd(1)–O(2)   | 90.18(16)  | N(2)#2–Cd(1)–O(2)   | 86.97(18)  |
| N(3)–Cd(1)–O(2)                                                                                                                             | 99.62(19)  | N(1)–Cd(1)–O(2)     | 135.02(18) | O(1)–Cd(1)–O(2)     | 53.84(18)  |
| O(3)#1–Cd(1)–O(4)#1                                                                                                                         | 52.87(17)  | N(2)#2–Cd(1)–O(4)#1 | 85.49(19)  | N(3)–Cd(1)–O(4)#1   | 89.85(18)  |
| N(1)–Cd(1)–O(4)#1                                                                                                                           | 82.41(19)  | O(1)–Cd(1)–O(4)#1   | 164.38(19) | O(2)–Cd(1)–O(4)#1   | 141.74(16) |
| <sup>b</sup> Symmetry codes: #1 -x+1/2,y+1/2,-z+1/2; #2 x-1/2,-y+1/2,z+1/2; #3 -x+1/2,y-1/2,-z+1/2; #4 x+1/2,-y+1/2,z-1/2; #5 -x+1,-y+2,-z. |            |                     |            |                     |            |
| Compound 3 <sup>c</sup>                                                                                                                     |            |                     |            |                     |            |
| Cd(1)–O(1)                                                                                                                                  | 2.3366(17) | Cd(1)–O(1)#4        | 2.3366(17) | Cd(1)–O(4)#2        | 2.3337(17) |
| Cd(1)–O(4)#3                                                                                                                                | 2.3337(17) | Cd(1)–N(1)          | 2.311(2)   | Cd(1)–N(2)#1        | 2.285(2)   |
| N(2)#1–Cd(1)–N(1)                                                                                                                           | 180.00(6)  | N(2)#1–Cd(1)–O(4)#2 | 93.87(5)   | N(1)–Cd(1)–O(4)#2   | 86.13(5)   |
| N(2)#1–Cd(1)–O(4)#3                                                                                                                         | 93.87(5)   | N(1)–Cd(1)–O(4)#3   | 86.13(5)   | O(4)#2–Cd(1)–O(4)#3 | 172.25(11) |
| N(2)#1–Cd(1)–O(1)#4                                                                                                                         | 84.83(5)   | N(1)–Cd(1)–O(1)#4   | 95.17(5)   | O(4)#2–Cd(1)–O(1)#4 | 80.89(6)   |
| O(4)#3–Cd(1)–O(1)#4                                                                                                                         | 99.82(6)   | N(2)#1–Cd(1)–O(1)   | 84.83(5)   | N(1)–Cd(1)–O(1)     | 95.17(5)   |
| O(4)#2–Cd(1)–O(1)                                                                                                                           | 99.82(6)   | O(4)#3–Cd(1)–O(1)   | 80.89(6)   | O(1)#4–Cd(1)–O(1)   | 169.65(10) |
| <sup>c</sup> Symmetry codes: #1 x-1,y-1,z; #2 -x+1/2,y-1/2,-z+1/4; #3 y-1/2,-x+1/2,z-1/4; #4 y,x,-z; #5 -y+1/2,x+1/2,z+1/4; #6 x+1,y+1,z.   |            |                     |            |                     |            |

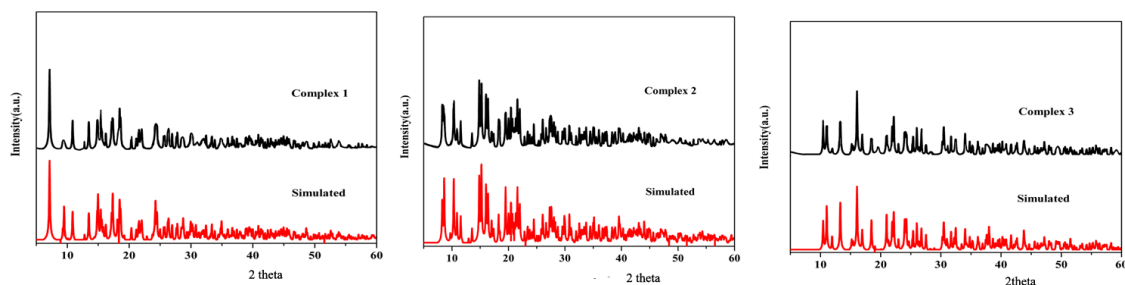

**Fig. S1** PXRD patterns of 1-3 simulated from X-ray single-crystal diffraction data and experimental data.

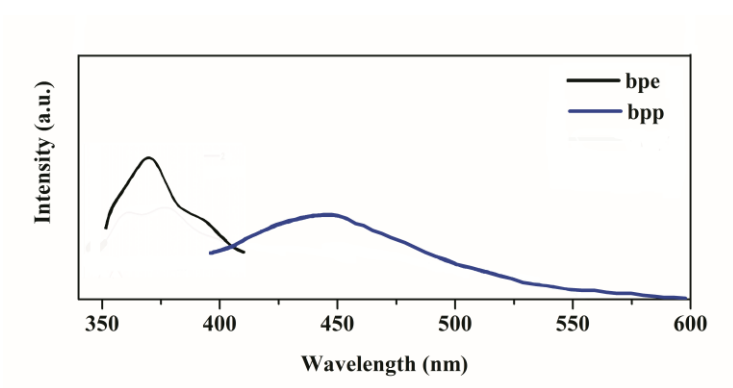

**Fig.S2** Solid-state emission spectra of free bpe and bpp ligand.
